# Supplementary material for: An extremely superhydrophobic and intrinsically stable Si/fluorocarbon energetic composite based on upright nano/submicron-sized Si wire arrays
Source: Royal Society of Chemistry journal article supplement (doi:10.1039/c5ra24633d), 2015-01-01
Supplement: c5ra24633d2.pdf [file c5ra24633d2.pdf]

## Supporting Information

### Extremely Superhydrophobic and Intrinsically Stable Si/Fluorocarbon Energetic Composites Based on Upright Nano/Submicron-Sized Si Wire Arrays

Xiang Zhou<sup>\*a</sup>, Ying Zhu<sup>b</sup>, Kaili Zhang<sup>b</sup>, Jian Lu<sup>b</sup> and Wei Jiang<sup>a</sup>

<sup>a</sup>National Special Superfine Powder Engineering Research Center, Nanjing University of Science and Technology, Nanjing, China

<sup>b</sup>Department of Mechanical and Biomedical Engineering, City University of Hong Kong, 83 Tat Chee Avenue, Kowloon, Hong Kong

\* Corresponding author: zx20022005@126.com

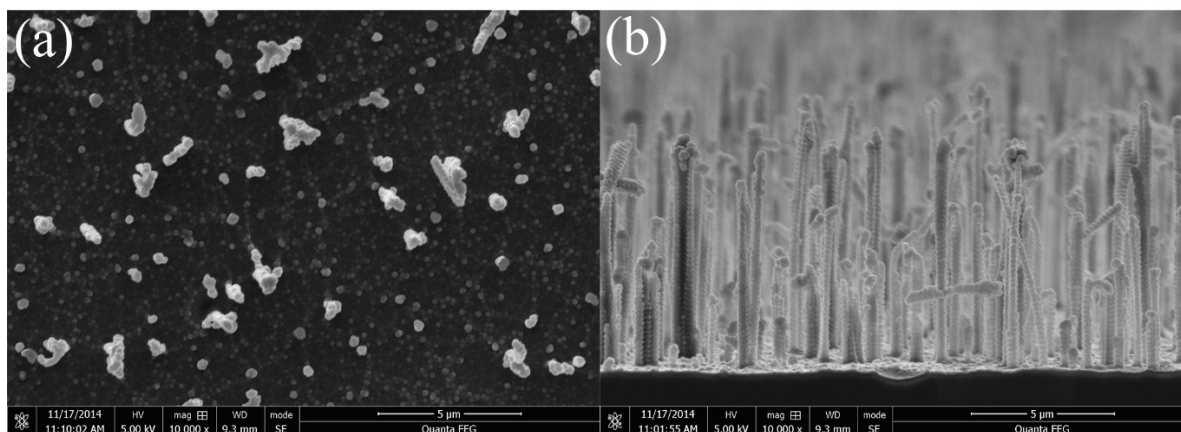

Fig. S1. (a) Top-view and (b) cross-sectional microscopic images of Si/fluorocarbon/Al/fluorocarbon. The Si wires are obtained after 40 min of DRIE.

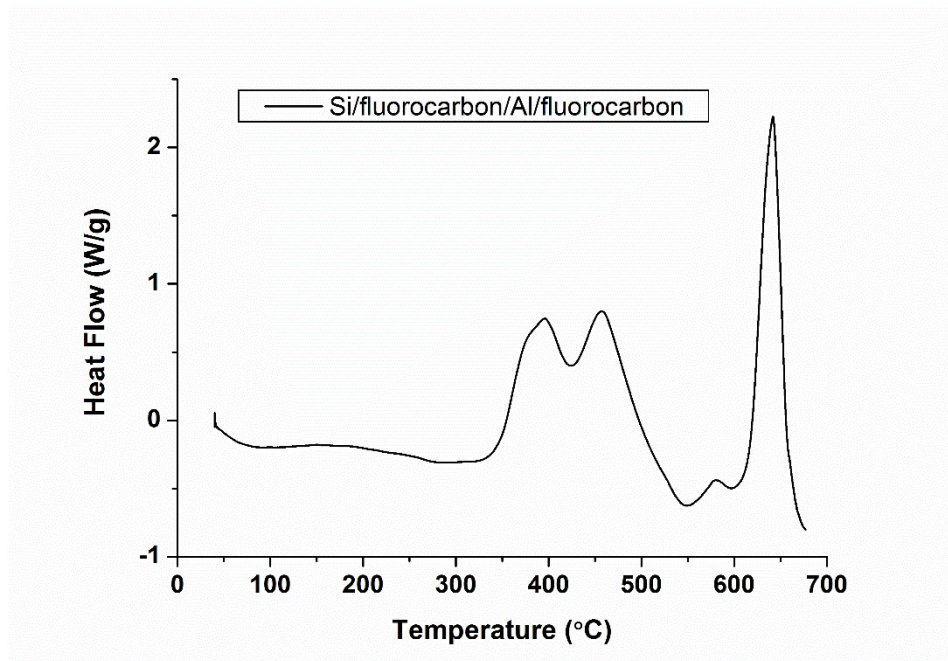

Fig. S2. DSC curve of Si/fluorocarbon/Al/fluorocarbon. The heating rate is 10 K/min.
